# Supplementary material for: Solution-processed oxadiazole-based electron-transporting layer for white organic light-emitting diodes
Source: Royal Society of Chemistry journal article supplement (doi:10.1039/c5ra04599a), 2015-01-01
Supplement: c5ra04599a1.pdf [file c5ra04599a1.pdf]

## Supporting Information

### Solution-Processed Oxadiazole-Based Electron-Transporting Layer for White Organic Light-Emitting Diodes

Ronghua Liu, Xinjun Xu,\* Jinghong Peng, Chuang Yao, Jinshan Wang, and Lidong Li\*

*School of Materials Science and Engineering, University of Science and Technology*

*Beijing, Beijing 100083, P. R. China. E-Mail: xuxj@mater.ustb.edu.cn (X.X.);*

*lidong@mater.ustb.edu.cn (L.L.). Fax: +86-10-82375712.*

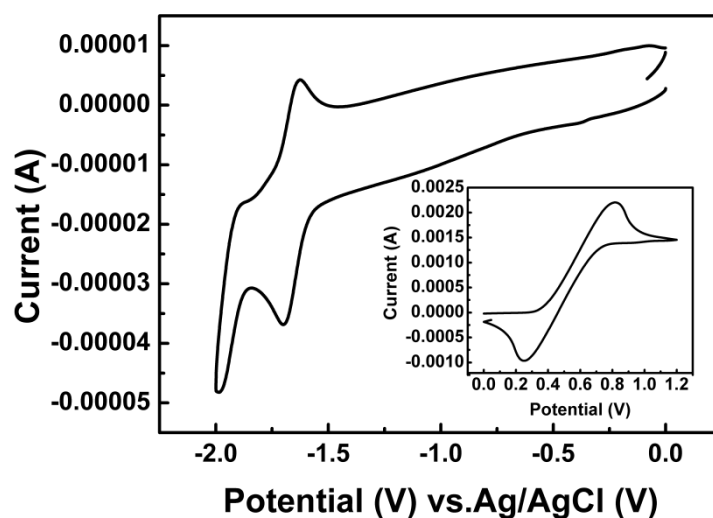

**Figure S1.** Cyclic voltammogram of OXDPPPO in acetonitrile solution with 0.1 M Bu<sub>4</sub>NPF<sub>6</sub> as the electrolyte at a potential scan rate of 10 mV s<sup>-1</sup>. The inset shows the redox curve of ferrocene. The first reduction peak was used to calculate the LUMO level of OXDPPPO.

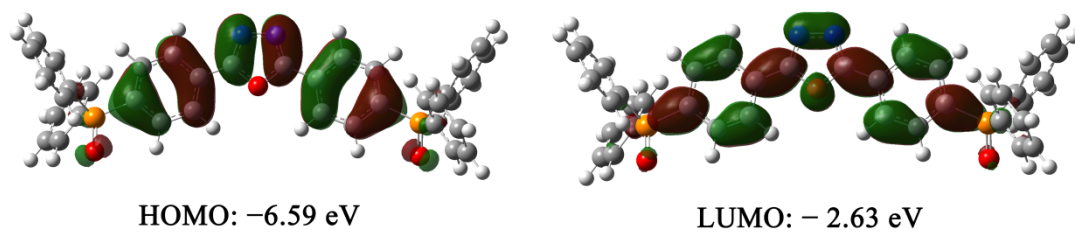

**Figure S2.** HOMO and LUMO orbital distributions and energy levels obtained from molecular simulation of OXDPPPO.

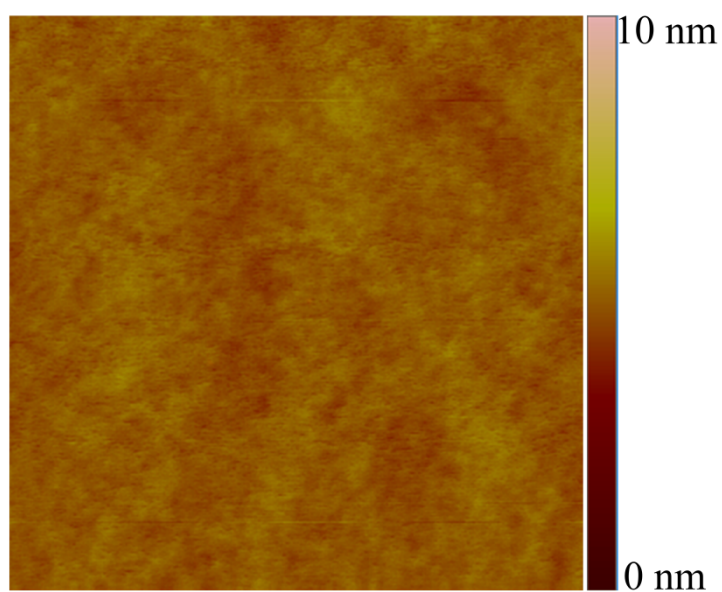

**Figure S3.** AFM image ( $2\ \mu\text{m} \times 2\ \mu\text{m}$  scale) of the surface morphology of solution-deposited OXDPPO film with a root-mean-square (RMS) surface roughness value of 0.25 nm (in device with a ITO/PEDOT:PSS (40 nm)/PVK:OXD-7:FIrpic:Ir(bt)<sub>2</sub>(acac) (80nm)/OXDPPO (20 nm) structure).

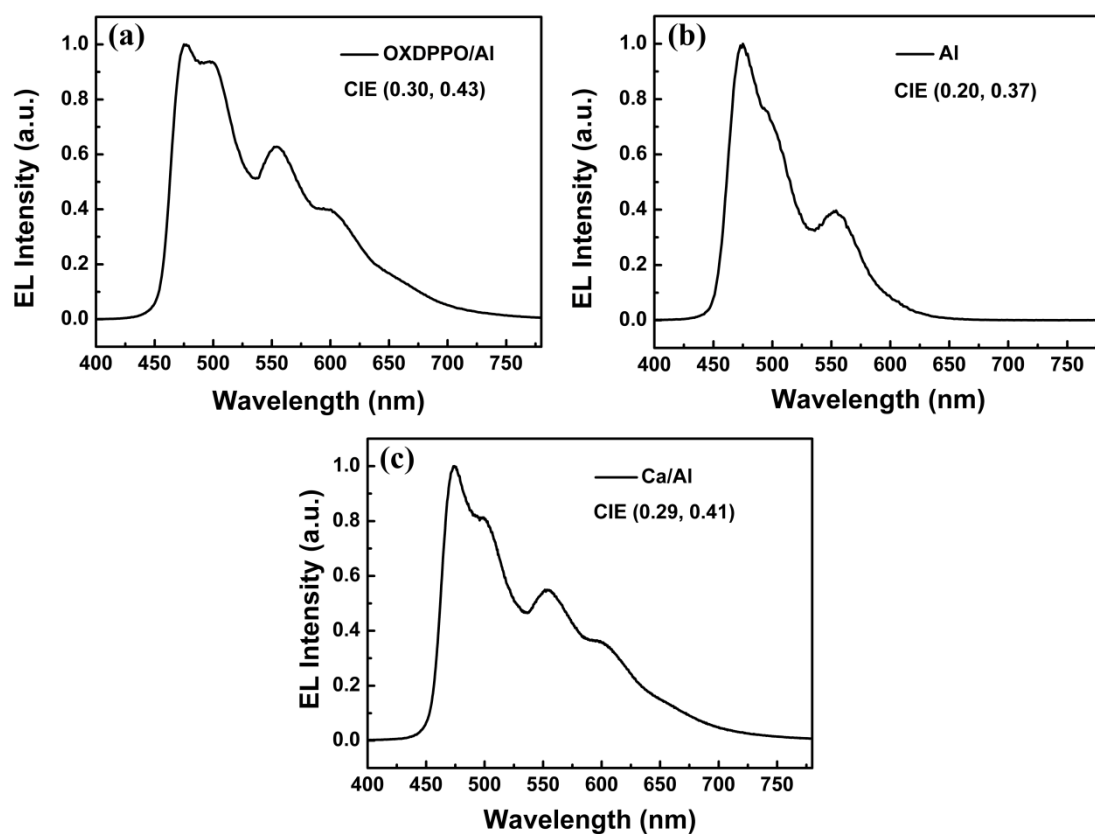

**Figure S4.** (a) The EL spectrum of device with the OXDPPPO/Al structure at 12 V; (b) the EL spectrum of device using the bare Al cathode at 12 V; (c) the EL spectrum of device with the Ca/Al configuration at 12 V.
